# Supplementary material
Source: PubMed Central journal article supplement (PMC4561035)
Supplement: NIHMS669720-supplement.pdf [file NIHMS669720-supplement.pdf]

## Structural Plasticity of the Hippocampus and Amygdala Induced by Electroconvulsive Therapy in Major Depression

### Supplemental Information

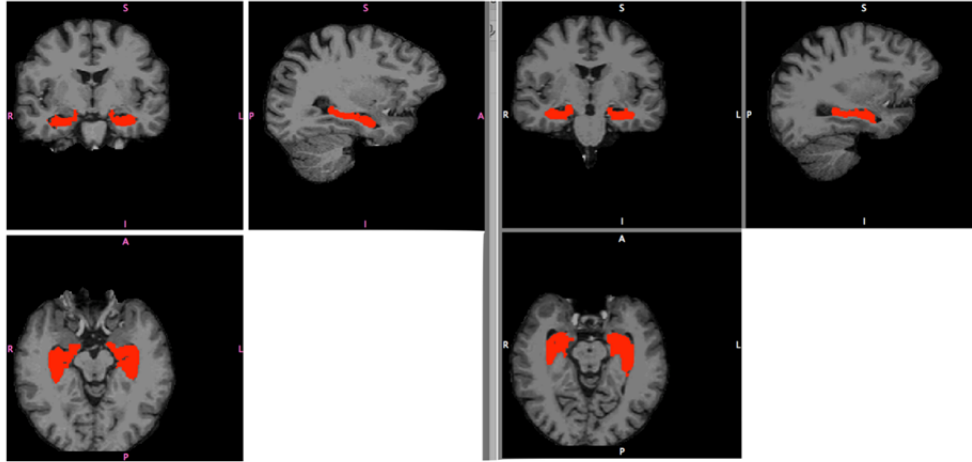

Patient at T1 (pre ECT):  
Left volume: 2367 mm<sup>3</sup>,  
Right volume: 2505 mm<sup>3</sup>

Patient at T3 (post ECT):  
Left volume: 2609 mm<sup>3</sup>,  
Right volume: 2685 mm<sup>3</sup>

**Figure S1.** Hippocampal segmentations for both hemispheres overlaid on the T1 image for a representative patient before and after undergoing electroconvulsive therapy (ECT).
